# Supplementary material
Source: Springer Nature journal article supplement (http://www.springermedizin.de/resource/supplementary/12943_2013_1141_MOESM4_ESM.pdf/9552590)
Supplement: MOESM4 [file 9552590]

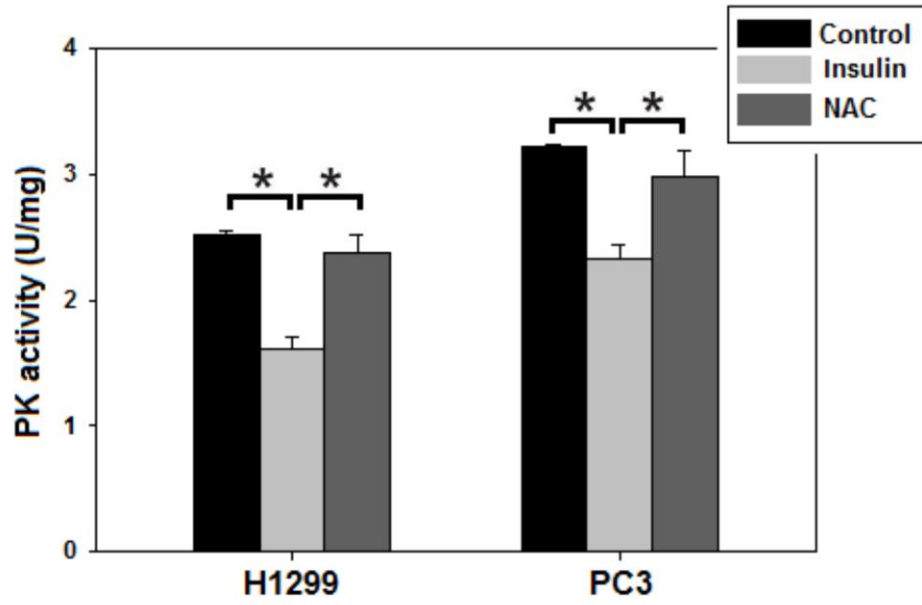

**Fig. S4.** Insulin treatment decreased PKM2 activity in H1299 and PC3 cells. Pretreatment with ROS scavenger- NAC, reversed insulin-induced decrease in activity. Data is expressed as mean  $\pm$ SE. \* $P \leq 0.05$ .
